# Supplementary material
Source: PubMed Central journal article supplement (PMC7416489)
Supplement: NIHMS1608599-supplement-2.pdf [file NIHMS1608599-supplement-2.pdf]

**Pro-EMT genes  
upregulated  
in reactive astrocytes  
14-days post-SCI**

| Gene      | log2-fold change |
|-----------|------------------|
| ANPEP     | 8.10             |
| CXCL1     | 7.81             |
| TIMP1     | 7.71             |
| CRLF1     | 7.27             |
| ECM1      | 6.43             |
| SERPINE1  | 6.15             |
| FN1       | 5.43             |
| COL3A1    | 5.02             |
| COL6A2    | 4.97             |
| TGFB1     | 4.71             |
| FSP1      | 4.43             |
| SDC1      | 4.23             |
| ELN       | 4.10             |
| SPP1      | 4.07             |
| ITGA5     | 4.03             |
| MGP       | 4.03             |
| POSTN     | 3.73             |
| CAPG      | 3.64             |
| COL16A1   | 3.63             |
| COL1A1    | 3.47             |
| FGF2      | 3.38             |
| COL5A1    | 3.34             |
| COL11A1   | 3.25             |
| ITGB3     | 3.25             |
| VIM       | 3.18             |
| PLAUR     | 3.08             |
| MYLK      | 3.04             |
| TGM2      | 3.04             |
| GPC1      | 2.96             |
| TAGLN     | 2.96             |
| TGFB1     | 2.96             |
| NID2      | 2.90             |
| TPM4      | 2.64             |
| ITGB5     | 2.47             |
| BGN       | 2.22             |
| FLNA      | 2.15             |
| IGFBP3    | 2.11             |
| MSX1      | 2.02             |
| PCOLCE    | 1.91             |
| TNFRSF12A | 1.89             |
| PVR       | 1.78             |
| PLOD3     | 1.76             |
| WIPF1     | 1.65             |
| QSOX1     | 1.63             |
| EMP3      | 1.58             |
| LOXL2     | 1.58             |
| JUN       | 1.56             |
| MMP2      | 1.54             |
| CXCL12    | 1.45             |
| LRP1      | 1.37             |
| VCAN      | 1.35             |
| COL1A2    | 1.22             |
| PMEP1     | 1.11             |
| TPM1      | 0.94             |
| ZEB2      | 0.94             |
| CALU      | 0.70             |
| ITGB1     | 0.70             |

**Pro-EMT genes  
unchanged  
in reactive astrocytes  
14-days post-SCI**

| Gene      | log2-fold change |
|-----------|------------------|
| GADD45B   | NS               |
| GEM       | NS               |
| GLIPR1    | NS               |
| CD44      | NS               |
| CD59      | NS               |
| CDH6      | NS               |
| EDIL3     | NS               |
| FAP       | NS               |
| ITGA2     | NS               |
| LRRC15    | NS               |
| THBS1     | NS               |
| THBS2     | NS               |
| THY1      | NS               |
| TNFRSF11B | NS               |
| ETS1      | NS               |
| FOXC2     | NS               |
| LEF1      | NS               |
| SNAI1     | NS               |
| SNAI2     | NS               |
| SNAI3     | NS               |
| TWI1      | NS               |
| TWI2      | NS               |
| ZEB1      | NS               |
| ADAM12    | NS               |
| CCN1      | NS               |
| CCN2      | NS               |
| COL12A1   | NS               |
| COL5A2    | NS               |
| COL5A3    | NS               |
| COL6A3    | NS               |
| COL8A2    | NS               |
| COMP      | NS               |
| CTHRC1    | NS               |
| FBLN2     | NS               |
| FBLN5     | NS               |
| FBN1      | NS               |
| FBN2      | NS               |
| LGALS1    | NS               |
| LOX       | NS               |
| MFAP5     | NS               |
| MMP14     | NS               |
| MMP3      | NS               |
| PCOLCE2   | NS               |
| PLOD1     | NS               |
| PLOD2     | NS               |
| SERPINE2  | NS               |
| SERPINH1  | NS               |
| SPOCK1    | NS               |
| TNC       | NS               |
| NNMT      | NS               |
| NT5E      | NS               |
| SCG2      | NS               |
| BMP1      | NS               |
| FAS       | NS               |
| FSTL1     | NS               |
| FZD8      | NS               |
| GREM1     | NS               |
| IGFBP2    | NS               |
| IL6       | NS               |
| INHBA     | NS               |
| RHOB      | NS               |
| WNT5A     | NS               |
| ACTA2     | NS               |
| CALD1     | NS               |
| MYL9      | NS               |
| SDC4      | NS               |
| TPM2      | NS               |
| MAGEE1    | NS               |
| MCM7      | NS               |
| MEST      | NS               |

**Pro-EMT genes  
down-regulated  
in reactive astrocytes  
14-days post-SCI**

| Gene   | log2-fold change |
|--------|------------------|
| TIMP3  | -0.7             |
| CDH2   | -0.86            |
| ENO2   | -0.94            |
| ITGAV  | -1.15            |
| CTNNA1 | -1.16            |
| FERMT2 | -1.16            |
| IGFBP4 | -1.26            |
| PDGFRB | -1.39            |
| CDH11  | -1.84            |
| LOXL1  | -2.61            |
| BDNF   | -3.56            |
| PTHLH  | -6.82            |

**Gene function related to:**

- Intra-cellular signaling
- Cell-surface and adhesion
- Transcription
- Extracellular matrix
- Metabolism/protein synthesis
- Intercellular signaling
- Cytoskeleton

**Figure S1.** Changes in pro-EMT gene expression levels in an RNA-seq database (Anderson et al., 2016) for reactive astrocytes 14 days post-SCI. Related to Figure 1. Genes with expression levels that either significantly increased, remain unchanged, or significantly decreased in reactive astrocytes relative to uninjured astrocytes are listed on the left, center, and right, respectively. For genes with significant changes, the corresponding log<sub>2</sub>-fold change in expression levels are listed, whereas genes with non-significant changes are indicated by “NS.” Measures of significance are provided by the database (Anderson et al., 2016).

**Anti-EMT genes  
upregulated  
in reactive astrocytes  
14-days post-SCI**

| Gene    | log2-fold change |
|---------|------------------|
| DSP     | 4.48             |
| LAMC2   | 3.84             |
| TNFAIP3 | 2.97             |
| DCN     | 2.40             |
| COL4A1  | 2.00             |
| DPYSL3  | 1.64             |
| LAMC1   | 1.53             |
| EFEMP2  | 1.46             |

**Anti-EMT genes  
unchanged  
in reactive astrocytes  
14-days post-SCI**

| Gene    | log2-fold change |
|---------|------------------|
| AREG    | NS               |
| CADM1   | NS               |
| CDH1    | NS               |
| BASP1   | NS               |
| GSC     | NS               |
| PRRX1   | NS               |
| COL4A2  | NS               |
| COL7A1  | NS               |
| FBLN1   | NS               |
| LAMA1   | NS               |
| LAMA2   | NS               |
| LAMA3   | NS               |
| LUM     | NS               |
| TFPI2   | NS               |
| SAT1    | NS               |
| DKK1    | NS               |
| GADD45A | NS               |
| NOTCH2  | NS               |
| SFRP1   | NS               |
| SFRP4   | NS               |
| SLIT2   | NS               |
| SLIT3   | NS               |
| TGFBR3  | NS               |
| KRT1    | NS               |
| PDLIM4  | NS               |
| PFN2    | NS               |

**Anti-EMT genes  
down-regulated  
in reactive astrocytes  
14-days post-SCI**

| Gene   | log2-fold change |
|--------|------------------|
| TJP1   | -0.69            |
| RGS4   | -1.41            |
| GAS1   | -1.67            |
| HTRA1  | -1.89            |
| GJA1   | -2.01            |
| ABI3BP | -2.22            |
| OXTR   | -2.46            |
| ID2    | -3.30            |

| Gene function related to:              |                              |
|----------------------------------------|------------------------------|
| <span style="color: red;">■</span>     | Intra-cellular signaling     |
| <span style="color: orange;">■</span>  | Cell-surface and adhesion    |
| <span style="color: yellow;">■</span>  | Transcription                |
| <span style="color: green;">■</span>   | Extracellular matrix         |
| <span style="color: cyan;">■</span>    | Metabolism/protein synthesis |
| <span style="color: blue;">■</span>    | Intercellular signaling      |
| <span style="color: magenta;">■</span> | Cytoskeleton                 |

**Figure S2.** Changes in EMT gene expression levels in an RNA-seq database (Anderson et al., 2016) for reactive astrocytes 14 days post-SCI. Related to Figure 1. Genes with expression levels that either significantly increase, remain unchanged, or significantly decrease in reactive astrocytes relative to uninjured astrocytes are listed on the left, center, and right, respectively. For genes with significant changes, the corresponding log2-fold change in expression levels are listed, whereas genes with non-significant changes are indicated by “NS.” Measures of significance are provided by the database (Anderson et al., 2016).

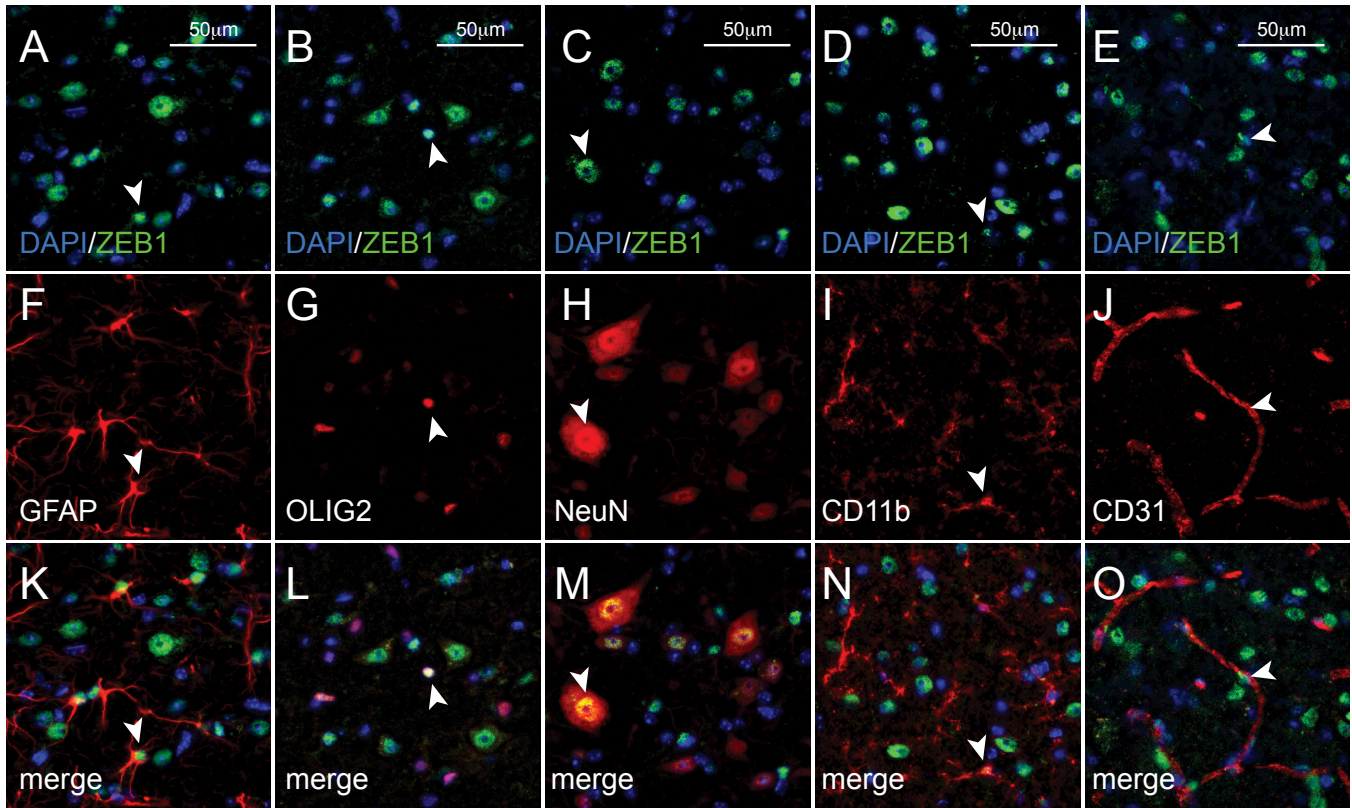

**Figure S3.** ZEB1 expression in spinal cord cell types following SCI. Related to Figure 1. **A-O**, immunofluorescence analysis in the spinal cord 14 days after injury at  $\sim 1500\mu\text{m}$  from the lesion shows ZEB1 was expressed in a subset of astrocytes (GFAP; panels A,F,K), oligodendrocytes (OLIG2; panels B,G,L), neurons (NeuN; panels C,H,M), microglia/macrophages (CD11b; panels D,I,N), and endothelial cells (CD31; panels E,J,O).

| <b>lncRNA</b>   | <i>log2 fold change</i> |                            |                                                    |
|-----------------|-------------------------|----------------------------|----------------------------------------------------|
|                 | <b>WT</b>               | <b>Stat3<sup>-/-</sup></b> |                                                    |
| <i>H19</i>      | 6.74                    | 3.90                       | <b><i>lncRNA without detectable expression</i></b> |
| <i>Rpph1</i>    | 5.53                    | 3.68                       |                                                    |
| <i>Halr1</i>    | 4.92                    | 5.42                       |                                                    |
| <i>RMPR</i>     | 4.70                    | 2.47                       |                                                    |
| <i>Kncq1ot1</i> | 2.91                    | NS                         |                                                    |
| <i>Airn</i>     | 2.18                    | NS                         |                                                    |
| <i>Zeb2os</i>   | 2.18                    | NS                         |                                                    |
| <i>Syne3</i>    | 1.94                    | 2.52                       |                                                    |
| <i>Malat1</i>   | 1.92                    | 1.24                       |                                                    |
| <i>Firre</i>    | 1.79                    | NS                         |                                                    |
| <i>Pvt1</i>     | 1.66                    | NS                         |                                                    |
| <i>Gas5</i>     | 1.35                    | NS                         |                                                    |
| <i>Neat1</i>    | 1.29                    | NS                         |                                                    |
| <i>Plscr4</i>   | -2.00                   | NS                         |                                                    |
| <i>Dancr</i>    | -3.06                   | NS                         |                                                    |
| <i>Paupar</i>   | -7.23                   | NS                         |                                                    |
| <i>Lhx1os</i>   | -8.44                   | NS                         |                                                    |
| <i>LncOL1</i>   | NS                      | 1.92                       |                                                    |
| <i>Pantr1</i>   | NS                      | -1.69                      |                                                    |
| <i>Snhg3</i>    | NS                      | -4.12                      |                                                    |
| <i>Abcc2</i>    | NS                      | NS                         | <b><i>lncRNA not contained within database</i></b> |
| <i>Crnde</i>    | NS                      | NS                         |                                                    |
| <i>Evx2</i>     | NS                      | NS                         |                                                    |
| <i>Fendrr</i>   | NS                      | NS                         |                                                    |
| <i>Itga2</i>    | NS                      | NS                         |                                                    |
| <i>Meg3</i>     | NS                      | NS                         |                                                    |
| <i>Miat</i>     | NS                      | NS                         |                                                    |
| <i>Moxi</i>     | NS                      | NS                         |                                                    |
| <i>Snhg1</i>    | NS                      | NS                         |                                                    |
| <i>Snhg5</i>    | NS                      | NS                         |                                                    |
| <i>Snhg14</i>   | NS                      | NS                         |                                                    |
| <i>Tsix</i>     | NS                      | NS                         |                                                    |
| <i>Tug1</i>     | NS                      | NS                         |                                                    |
| <i>Tunar</i>    | NS                      | NS                         |                                                    |
| <i>Xist</i>     | NS                      | NS                         |                                                    |

**Figure S4.** Changes in gene expression levels for lncRNAs in an RNA-seq database (Anderson et al., 2016) of reactive astrocytes 14 days post-SCI. Related to Figure 3. lncRNAs with expressed levels that either significantly increase, remain unchanged, or significantly decrease in reactive astrocytes relative to uninjured astrocytes are listed with either their corresponding log<sub>2</sub>-fold change in expression levels or “NS” to indicate a non-significant change. Measures of significance are provided by the database (Anderson et al., 2016). Established lncRNAs that either did not have detectable expression levels or were not included the database are also listed.

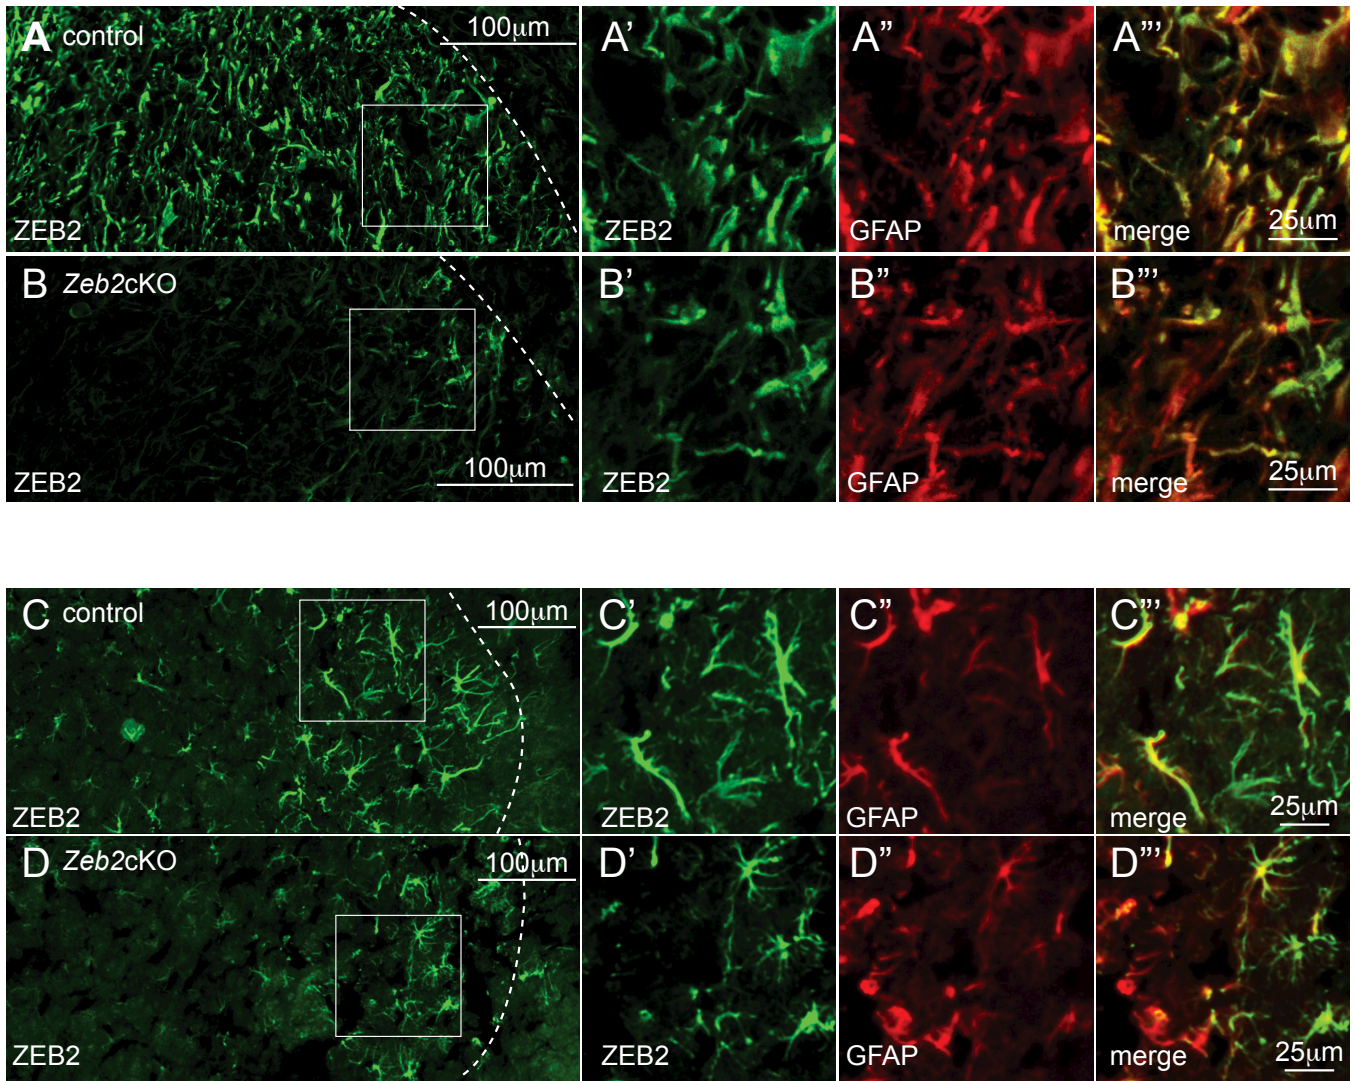

**Figure S5.** Residual ZEB2 expression at lesion borders in *Zeb2cKO* mice. Related to Figures 4 and 5. **A-B** and **C-D**, ZEB2 expression in 14 days post-SCI and 3 days post-stroke, respectively, show a knockout, but not complete elimination, of ZEB2 in GFAP<sup>+</sup> astrocytes near the lesion borders.

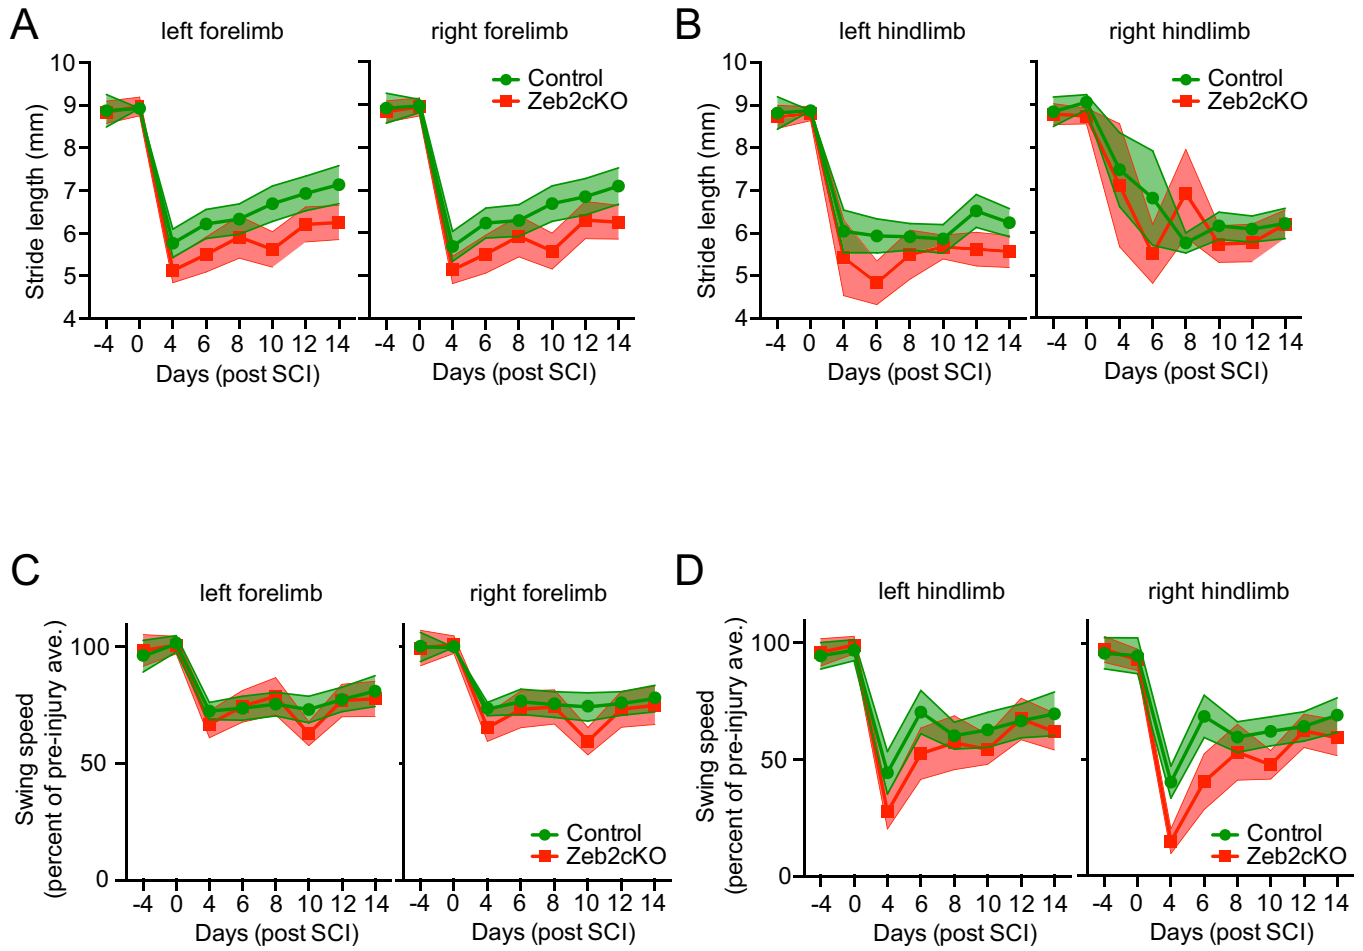

**Figure S6.** Analysis of motor function recovery following SCI. Related to Figure 6. **A-B** and **C-D**, quantitative analysis of gait (CatWalk) parameters following SCI show no change in the recovery of stride length and swing speed for control and *Zeb2cKO* mice. Two-way ANOVA with repeated measures,  $n=9$  for control and  $n=11$  for *Zeb2cKO* mice, power=0.97 and 0.95 (A), 0.41 and 0.69 (B), 0.65 and 0.77 (C), 0.92 and 0.98 (D).
